# Supplementary material for: Facile fabrication of RGO wrapped LiMn2O4 nanorods as a cathode with enhanced specific capacity
Source: Royal Society of Chemistry journal article supplement (doi:10.1039/c5ra09783e), 2015-01-01
Supplement: c5ra09783e1.pdf [file c5ra09783e1.pdf]

## Facile Fabrication of RGO wrapped $\text{LiMn}_2\text{O}_4$ Nanorods as Cathode with Enhanced Specific Capacity

Jiarui He, Yuanfu Chen\*, Pingjian Li\*, Fei Fu, Jingbo Liu, and Zegao Wang

State Key Laboratory of Electronic Thin Films and Integrated Devices, University of  
Electronic Science and Technology of China, Chengdu 610054, P. R. China

\* Corresponding authors, E-mail: [yfchen@uestc.edu.cn](mailto:yfchen@uestc.edu.cn), [lipingjian@uestc.edu.cn](mailto:lipingjian@uestc.edu.cn)

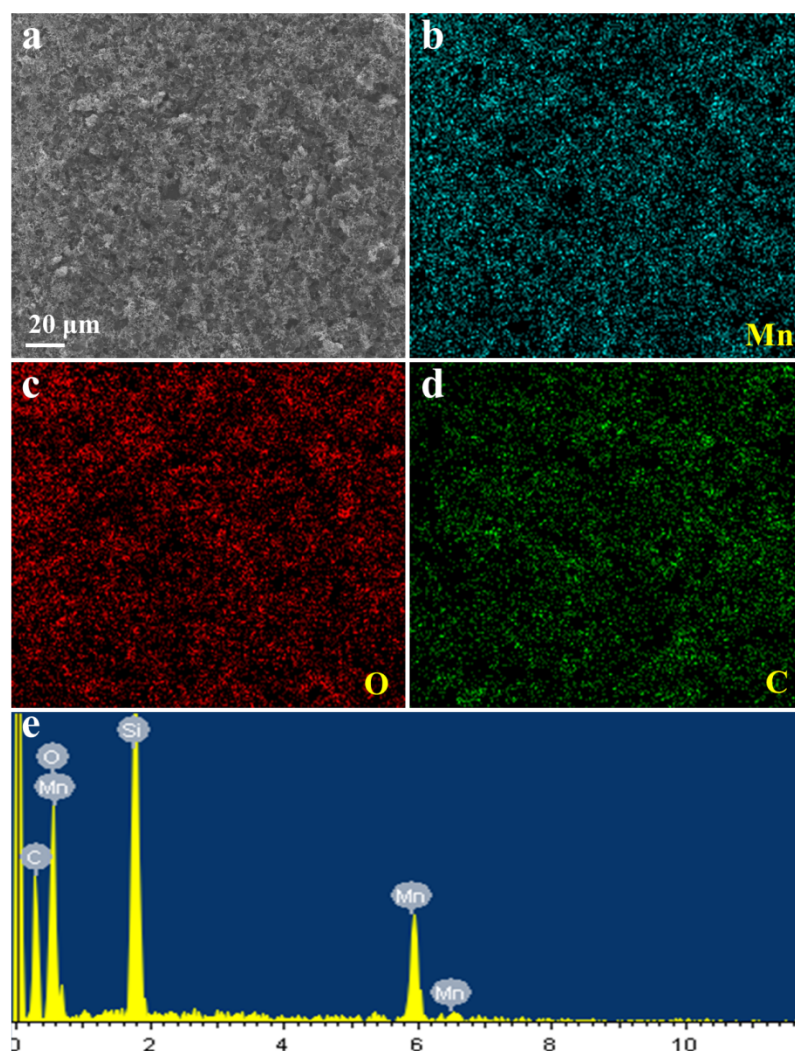

Fig. S1 (a) Typical SEM image of LNs/RGO and the corresponding elemental mapping images of (b) Mn, (c) O, (d) C. (e) The EDX spectra of the LNs/RGO composites, showing the presence and relative atomic fractions of Mn, O and C. Li cannot be detected using EDX; the Si peak arises from the Si substrate.

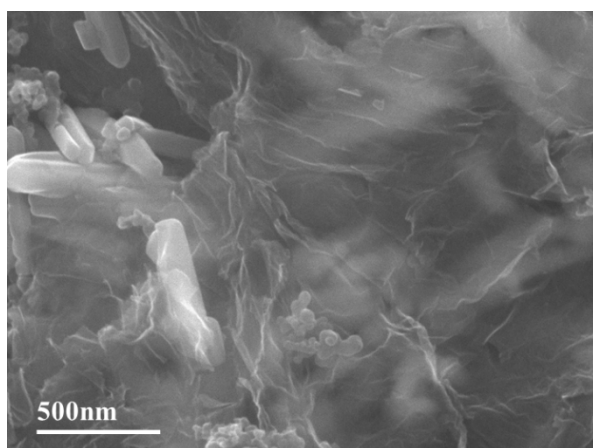

Fig. S2 SEM images of LNs/RGO after cycling.
